# Supplementary material for: The pivotal alkyne group in the mutual size-conversion of Au9 with Au10 nanoclusters
Source: Royal Society of Chemistry journal article supplement (doi:10.1039/d1dt01586a), 2021-01-01
Supplement: d1dt01586a2.pdf [file d1dt01586a2.pdf]

## Electronic Supplementary Information (ESI)

### The Pivotal Alkyne Group in the Mutual Size-Conversion of Au<sub>9</sub> with Au<sub>10</sub> Nanoclusters

Xiaohang Wu,<sup>a</sup> Ying Lv,<sup>a</sup> Yuyuan Bai,<sup>a</sup> Haizhu Yu,<sup>\*ab</sup> and Manzhou Zhu<sup>ab</sup>

<sup>a</sup>Anhui Province Key Laboratory of Chemistry for Inorganic/Organic Hybrid Functionalized Materials, Key Laboratory of Structure and Functional Regulation of Hybrid Materials of Ministry of Education, Anhui University, Hefei, Anhui, 230601 P. R. China.

Email: yuhaizhu@ahu.edu.cn.

<sup>b</sup>Institute of Physical Science and Information Technology, Anhui University, Hefei, Anhui, 230601 P. R. China.

**Table S1.** Selected structural parameters for the single crystal structure ( $\text{Au}_9/\text{Au}_{10}\text{-crys}$ ), full-ligands protected structure ( $\text{Au}_9^{\text{T}}/\text{Au}_{10}^{\text{T-full}}$ ), and simplified ligands protected structures ( $\text{Au}_9^{\text{T}}/\text{Au}_{10}^{\text{T}}$ ).

|                                  | $\text{BD}^{\text{Au-Au}}$ | $\text{DA}^{8-9-10-3}$ | $\text{DA}^{7-8-9-10}$ | $\text{DA}^{2-7-8-9}$ | $\text{DA}^{3-2-7-8}$ | $\text{DA}^{10-3-2-7}$ | $\text{DA}^{9-10-3-2}$ |
|----------------------------------|----------------------------|------------------------|------------------------|-----------------------|-----------------------|------------------------|------------------------|
| $\text{Au}_9\text{-crys}$        | 2.776                      | 29.6                   | 296.9                  | 79.5                  | 296.7                 | 21.4                   | 354.2                  |
| $\text{Au}_9^{\text{T-full}}$    | 2.866                      | 22.3                   | 302.3                  | 76.1                  | 298.7                 | 17.5                   | 0.4                    |
| $\text{Au}_9^{\text{T}}$         | 2.850                      | 20.7                   | 303.5                  | 76.0                  | 299.5                 | 17.2                   | 1.2                    |
| $\text{Au}_{10}\text{-crys}$     | 2.867                      | 41.8                   | 285.0                  | 85.6                  | 287.3                 | 31.3                   | 28.8                   |
| $\text{Au}_{10}^{\text{T-full}}$ | 2.986                      | 40.7                   | 290.6                  | 80.0                  | 292.3                 | 32.0                   | 328.3                  |
| $\text{Au}_{10}^{\text{T}}$      | 2.942                      | 58.0                   | 283.9                  | 73.7                  | 299.7                 | 38.5                   | 321.3                  |

Note: The average Au-Au bond distances ( $\text{BD}^{\text{Au-Au}}$ ) and dihedral angles ( $\text{DA}^{\text{a-b-c-d}}$ ) are given in angstrom and degree, respectively. The calculation method on  $\text{Au}_9^{\text{T}}/\text{Au}_{10}^{\text{T-full}}$  is the same as that of the modeling  $\text{Au}_9^{\text{T}}/\text{Au}_{10}^{\text{T}}$ .

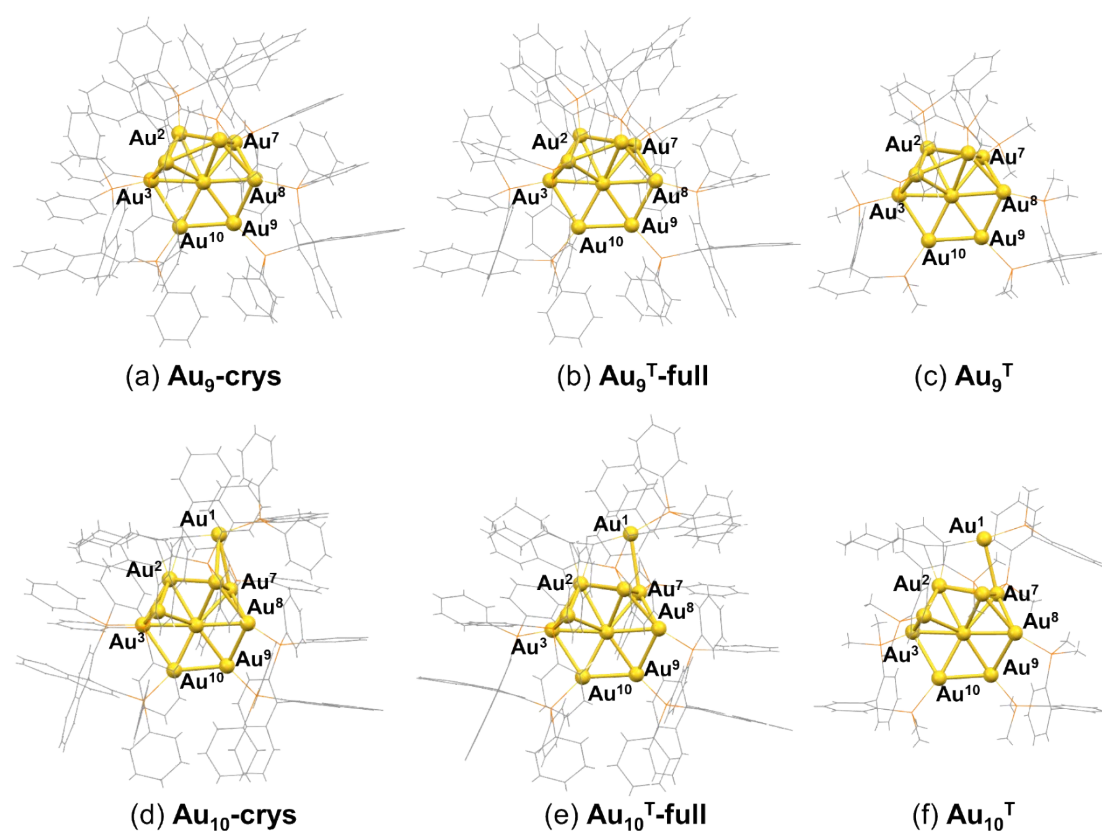

**Figure S1.** The geometries of the single crystal structures of  $\text{Au}_9^{\text{T}}/\text{Au}_{10}^{\text{T-crys}}$ ,  $\text{Au}_{9/10}$  cluster with full ligands ( $\text{Au}_9^{\text{T}}/\text{Au}_{10}^{\text{T-full}}$ ), and  $\text{Au}_{9/10}$  cluster with simplified ligands ( $\text{Au}_9^{\text{T}}/\text{Au}_{10}^{\text{T}}$ ).

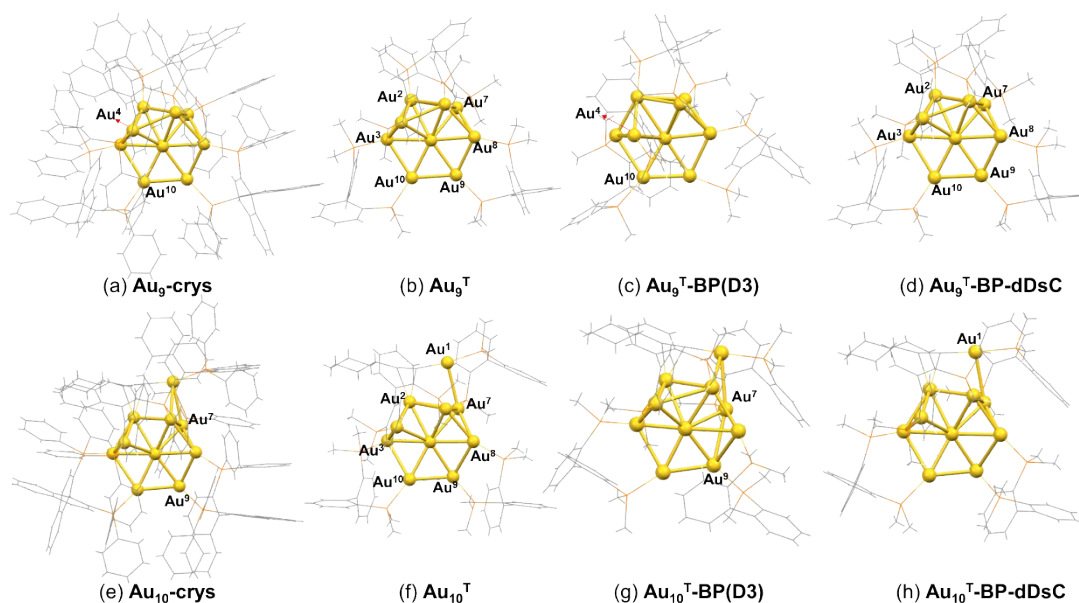

**Figure S2.** Comparison of the single crystal structure ( $\text{Au}_9^{\text{T}}/\text{Au}_{10}^{\text{T}}$ ) and the optimized geometries of  $\text{Au}_9^{\text{T}}/\text{Au}_{10}^{\text{T}}$  calculated with BP, BP-D3(BJ) and BP-dDsC functions.

**Table S2.** Some structural parameters of single crystal structure of  $\text{Au}_{10}/\text{Au}_9$  and parameters of optimized geometries of  $\text{Au}_{10}^{\text{T}}/\text{Au}_9^{\text{T}}$  calculated with BP, BP-D3(BJ) and BP-dDsC functions.

|                                            | $\text{BD}^{4-10}$ | $\text{BD}^{7-9}$ | $\text{DA}^{8-9-10-3}$ | $\text{DA}^{7-8-9-10}$ | $\text{DA}^{3-2-7-8}$ | $\text{DA}^{10-3-2-7}$ |
|--------------------------------------------|--------------------|-------------------|------------------------|------------------------|-----------------------|------------------------|
| $\text{Au}_{10}\text{-crys}$               | 3.926              | 3.930             | 41.8                   | 285.0                  | 287.3                 | 31.3                   |
| $\text{Au}_{10}^{\text{T}}$                | 3.911              | 4.307             | 58.0                   | 283.9                  | 299.7                 | 38.5                   |
| $\text{Au}_{10}^{\text{T}}\text{-BP(D3)}$  | 4.394              | 3.089             | 57.4                   | 262.6                  | 281.3                 | 18.5                   |
| $\text{Au}_{10}^{\text{T}}\text{-BP-dDsC}$ | 3.973              | 3.885             | 60.3                   | 272.9                  | 291.8                 | 32.5                   |
| $\text{Au}_9\text{-crys}$                  | 4.138              | 4.130             | 29.6                   | 296.9                  | 296.7                 | 21.4                   |
| $\text{Au}_9^{\text{T}}$                   | 4.287              | 4.302             | 20.7                   | 303.5                  | 299.5                 | 17.2                   |
| $\text{Au}_9^{\text{T}}\text{-BP(D3)}$     | 3.360              | 4.535             | 32.7                   | 307.8                  | 285.9                 | 49.6                   |
| $\text{Au}_9^{\text{T}}\text{-BP-dDsC}$    | 4.268              | 4.253             | 23.8                   | 301.5                  | 301.4                 | 16.6                   |

Note: The Au-Au bond distances ( $\text{BD}^{\text{a-b}}$ ) and dihedral angles ( $\text{DA}^{\text{a-b-c-d}}$ ) are given in angstrom and degree, respectively.

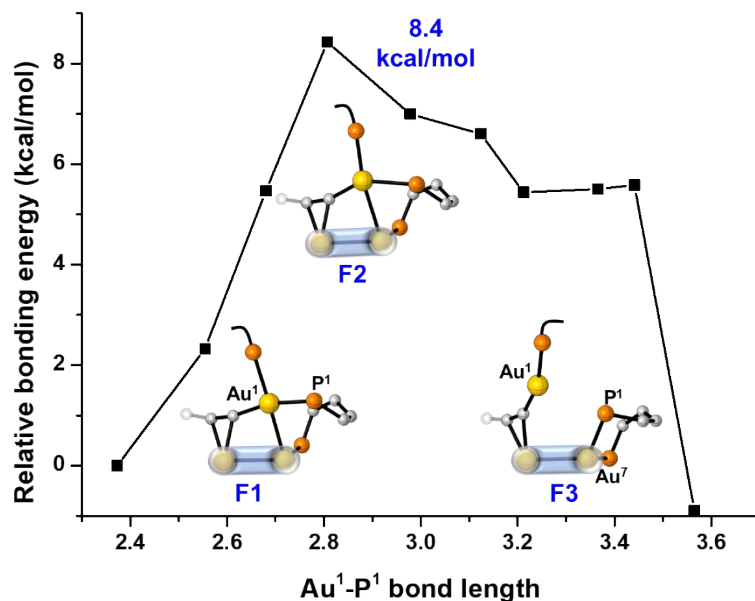

**Figure S3.** Partial optimization by fixing the Au<sup>1</sup>-P<sup>1</sup> bond length at different values (from 2.373 Å in Au<sub>10</sub><sup>T</sup>-I1 to 3.565 Å in Au<sub>10</sub><sup>T</sup>-I3). The relative bonding energies are given in kcal/mol, and the relative energy of F1 is set as the reference.

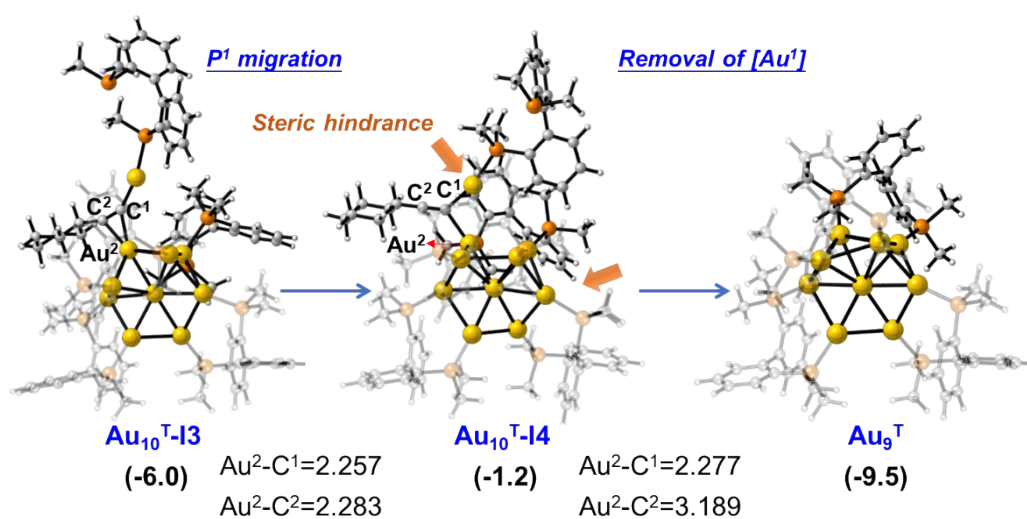

**Figure S4.** The optimized geometry and relative bonding energy (in kcal/mol) of Au<sub>10</sub><sup>T</sup>-I3, Au<sub>10</sub><sup>T</sup>-I4 and Au<sub>9</sub><sup>T</sup>. The orange arrow illustrates the steric hindrance between the exterior ligands. The selected bond distances are given in angstrom.

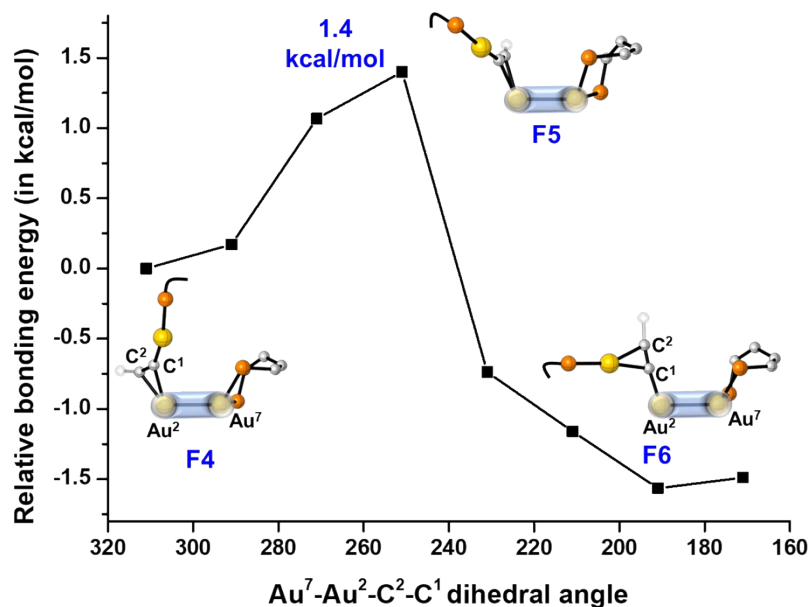

**Figure S5.** Partial optimization by fixing the  $\text{Au}^7\text{-Au}^2\text{-C}^2\text{-C}^1$  dihedral angle at different values (from  $310.8^\circ$  in  $\text{Au}_{10}^{\text{T-I3}}$  to  $171.2^\circ$  in  $\text{Au}_{10}^{\text{T-I5}}$ ). The relative bonding energies are given in kcal/mol, and the relative energy of **F4** is set as the reference. **F4** is optimization structure fixed at  $310.8^\circ$ , the relative energy is 0.2 kcal/mol higher than that of  $\text{Au}_{10}^{\text{T-I3}}$ .

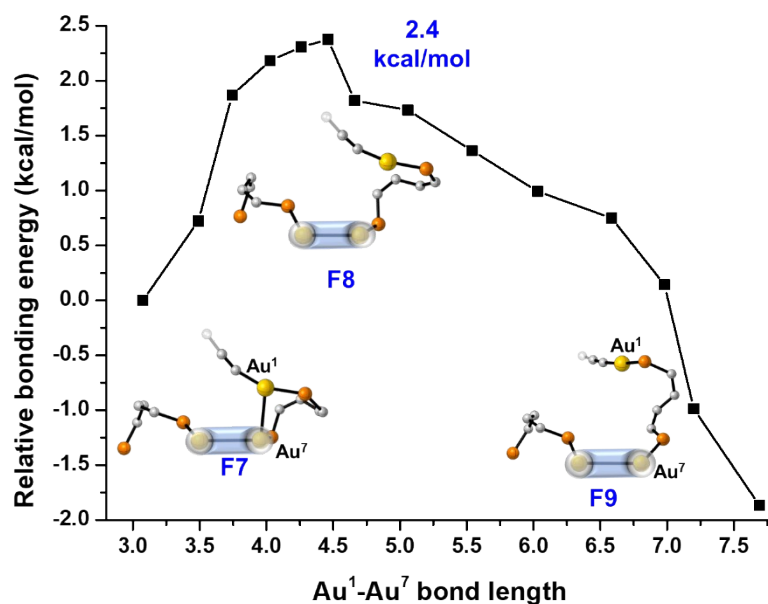

**Figure S6.** Partial optimization by fixing the  $\text{Au}^1\text{-Au}^7$  bond length at different values (from  $3.075 \text{ \AA}$  in  $\text{Au}_{10}^{\text{T-I7}}$  to  $7.694 \text{ \AA}$  in  $\text{Au}_{10}^{\text{T-I8}}$ ). The relative bonding energies are given in kcal/mol, and the relative energy of **F7** is set as the reference.

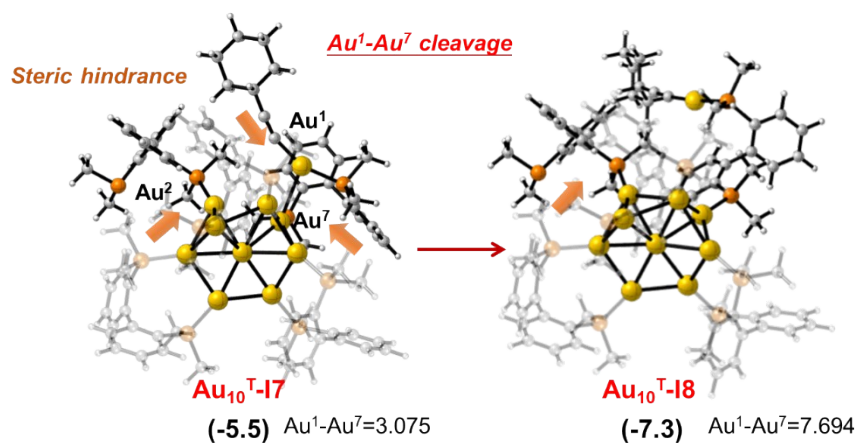

**Figure S7.** The optimized geometry and relative bonding energy (in kcal/mol) of **Au<sub>10</sub><sup>T</sup>-I7** and **Au<sub>10</sub><sup>T</sup>-I8**. The orange arrow illustrates the steric hindrance between the exterior ligands. The selected bond distances are given in angstrom.

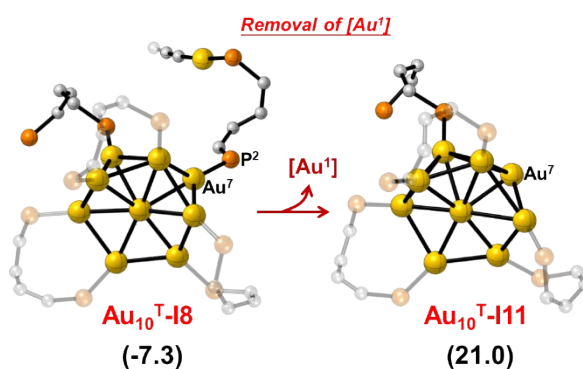

**Figure S8.** The optimized geometry and the relative bonding energies (in kcal/mol) after the removal of [Au<sup>1</sup>] from **Au<sub>10</sub><sup>T</sup>-I8**. For clarity, all hydrogen atoms in optimized geometries are omitted, and only one carbon atom of the cyclohexyl group on C<sup>2</sup> atom is shown.

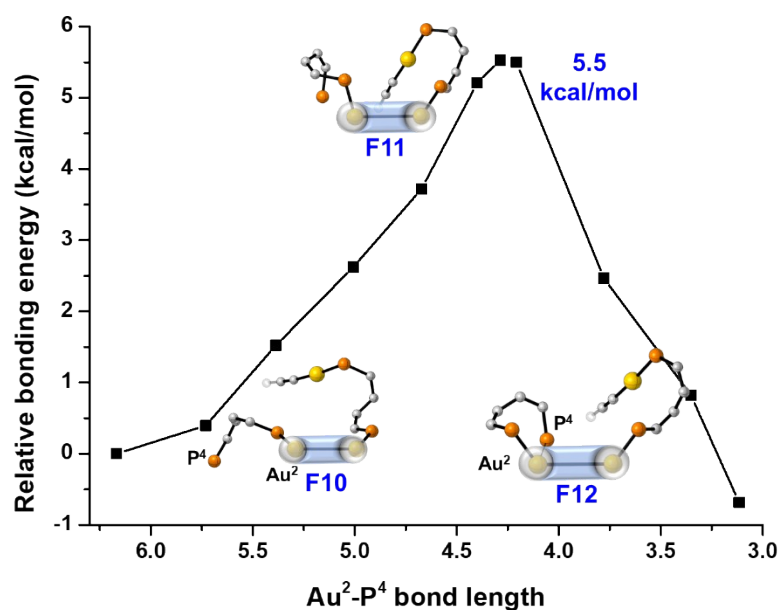

**Figure S9.** Partial optimization by fixing the Au<sup>2</sup>-P<sup>4</sup> bond length at different values (from 6.169 Å in Au<sub>10</sub><sup>T-I8</sup> to 3.116 Å in Au<sub>10</sub><sup>T-I9</sup>). The relative bonding energies are given in kcal/mol, and the relative energy of F10 is set as the reference.

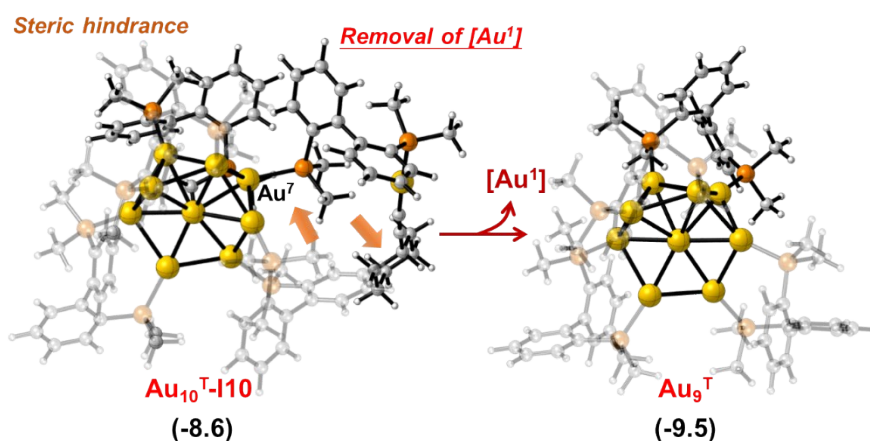

**Figure S10.** The optimized geometry and relative bonding energy (in kcal/mol) of Au<sub>10</sub><sup>T-I10</sup> and Au<sub>9</sub><sup>T</sup>. The orange arrow illustrates the steric hindrance between the exterior ligands.

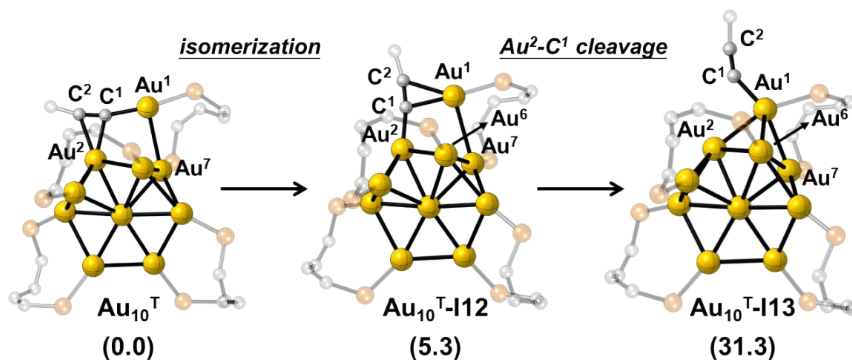

**Figure S11.** The removal of the Au<sup>1</sup>-alkyne group from Au<sub>10</sub><sup>T</sup> via the cleavage of Au<sup>2</sup>-

alkyne. The relative bonding energies are given in kcal/mol.

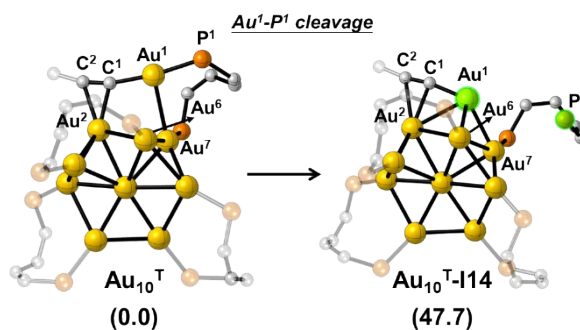

**Figure S12.** The removal of the Au<sup>1</sup>-alkyne group from Au<sub>10</sub><sup>T</sup> via the cleavage of Au<sup>1</sup>-P<sup>1</sup>. The relative bonding energies are given in kcal/mol.

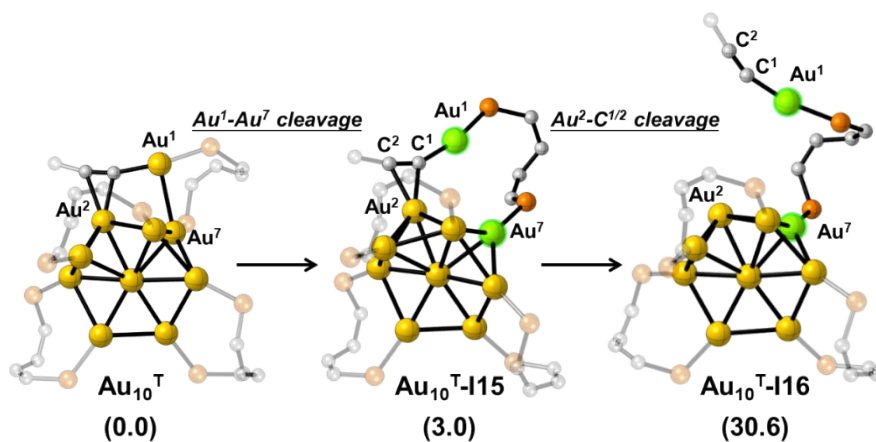

**Figure S13.** The removal of the Au<sup>1</sup>-alkyne group from Au<sub>10</sub><sup>T</sup> via the cleavage of Au<sup>1</sup>-Au<sup>7</sup>. The relative bonding energies are given in kcal/mol.

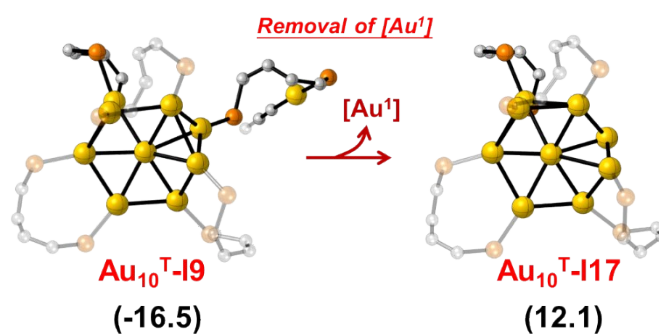

**Figure S14.** The optimized geometry and the relative bonding energies (in kcal/mol) after the removal of [Au<sup>1</sup>] from Au<sub>10</sub><sup>T</sup>-I19.

**Table S3.** Entropy and approximate Gibbs free energy of Au<sub>10</sub><sup>T</sup>-I19 and Au<sub>9</sub><sup>T</sup>.

|                                    | Bond energy(kcal/mol) | Entropy(cal/mole-K) | ΔG(kcal/mol) |
|------------------------------------|-----------------------|---------------------|--------------|
| Au <sub>10</sub> <sup>T</sup>      | -23568.06             | 546.177             |              |
| Au <sub>10</sub> <sup>T</sup> -I19 | -28737.07             | 616.265             | -1.08        |
| Au <sub>9</sub> <sup>T</sup>       | -20980.84             | 494.570             | -10.9        |



|                  |          |         |
|------------------|----------|---------|
| <b>DMPP</b>      | -5152.55 | 121.674 |
| <b>DMPP-CCAu</b> | -7749.31 | 177.907 |

Note: The temperature used in our calculation is 298.15K. G=H-TS, we use bond energy to estimate enthalpy to calculate Gibbs free energy. DMPP-CCAu is the Au-alkyne-DMPP moiety. The reaction equation:  $\text{Au}_{10}^{\text{T}} + \text{DMPP} \rightarrow \text{Au}_9^{\text{T}} + \text{DMPP-CCAu}$ .

**Table S4.** Different methods calculate the intermediates and transition state of the conversion of  $\text{Au}_{10}^{\text{T}}$  to  $\text{Au}_9^{\text{T}}$  through Path II.

|                                                 | BP    | PBE   | TPSS  |
|-------------------------------------------------|-------|-------|-------|
| $\text{Au}_{10}^{\text{T}}$                     | 0.0   | 0.0   | 0.0   |
| $\text{Au}_{10}^{\text{T-I2}}$                  | -0.9  | -7.7  | -4.3  |
| $\text{Au}_{10}^{\text{T-I7}}$                  | -5.5  | -11.7 | -7.0  |
| $\text{Au}_{10}^{\text{T-TS}^{\text{F}(7-8)}}$  | -3.1  | -8.1  | -4.0  |
| $\text{Au}_{10}^{\text{T-I8}}$                  | -7.3  | -10.2 | -7.4  |
| $\text{Au}_{10}^{\text{T-TS}^{\text{F}(8-9)}}$  | -1.8  | -6.5  | -3.6  |
| $\text{Au}_{10}^{\text{T-I9}}$                  | -16.5 | -21.2 | -16.2 |
| $\text{Au}_{10}^{\text{T-TS}^{\text{F}(9-10)}}$ | 0.6   | -4.6  | -1.0  |
| $\text{Au}_{10}^{\text{T-I10}}$                 | -8.6  | -15.3 | -9.8  |
| $\text{Au}_9^{\text{T}}$                        | -9.5  | -11.8 | -9.8  |

Note: Geometry optimization was conducted with the GGA: BP functional, based on the optimized geometries, the solution phase single point energy calculations were carried out with COSMO model and different methods (such as PBE and TPSS).

**Table S5.** The Hirshfeld charge on Au atoms of  $\text{Au}_{10}^{\text{T}}$  and  $\text{Au}_{10}^{\text{T-I2}}$  calculated by different methods.

| $\text{Au}_{10}^{\text{T}}$    | Au <sup>1</sup> | Au <sup>2</sup> | Au <sup>3</sup> | Au <sup>4</sup> | Au <sup>5</sup>  |                   |
|--------------------------------|-----------------|-----------------|-----------------|-----------------|------------------|-------------------|
| BP                             | 0.113           | 0.089           | 0.010           | 0.032           | -0.046           | -                 |
| PBE                            | 0.119           | 0.092           | 0.013           | 0.037           | -0.047           | -                 |
| TPSS                           | 0.127           | 0.089           | 0.012           | 0.037           | -0.052           | -                 |
| $\text{Au}_{10}^{\text{T}}$    | Au <sup>6</sup> | Au <sup>7</sup> | Au <sup>8</sup> | Au <sup>9</sup> | Au <sup>10</sup> | Au <sup>sum</sup> |
| BP                             | 0.012           | 0.014           | 0.002           | -0.012          | -0.007           | 0.207             |
| PBE                            | 0.015           | 0.017           | 0.005           | -0.008          | -0.003           | 0.240             |
| TPSS                           | 0.015           | 0.017           | 0.005           | -0.01           | -0.004           | 0.236             |
| $\text{Au}_{10}^{\text{T-I2}}$ | Au <sup>1</sup> | Au <sup>2</sup> | Au <sup>3</sup> | Au <sup>4</sup> | Au <sup>5</sup>  |                   |
| BP                             | 0.125           | 0.080           | 0.012           | 0.015           | -0.051           | -                 |
| PBE                            | 0.130           | 0.082           | 0.015           | 0.020           | -0.052           | -                 |
| TPSS                           | 0.136           | 0.084           | 0.013           | 0.019           | -0.057           | -                 |
| $\text{Au}_{10}^{\text{T-I2}}$ | Au <sup>6</sup> | Au <sup>7</sup> | Au <sup>8</sup> | Au <sup>9</sup> | Au <sup>10</sup> | Au <sup>sum</sup> |
| BP                             | 0.010           | 0.008           | 0.007           | -0.013          | -0.008           | 0.185             |
| PBE                            | 0.013           | 0.011           | 0.011           | -0.009          | -0.004           | 0.217             |
| TPSS                           | 0.012           | 0.010           | 0.009           | -0.010          | -0.006           | 0.210             |

Note: Au<sup>sum</sup> is the total charge of Au core of  $\text{Au}_{10}^{\text{T}}$  and  $\text{Au}_{10}^{\text{T-I2}}$ .

**Table S6.** The Hirschfeld charge of all Au atoms of **Au<sub>9</sub><sup>T</sup>** and **Au<sub>10</sub><sup>T</sup>**.

|                                       | Au <sup>1</sup> | Au <sup>2</sup> | Au <sup>3</sup> | Au <sup>4</sup> | Au <sup>5</sup>  |
|---------------------------------------|-----------------|-----------------|-----------------|-----------------|------------------|
| <b>In Au<sub>9</sub><sup>T</sup></b>  | -               | 0.007           | 0.001           | 0.011           | -0.049           |
| <b>In Au<sub>10</sub><sup>T</sup></b> | 0.113           | 0.089           | 0.01            | 0.032           | -0.046           |
|                                       | Au <sup>6</sup> | Au <sup>7</sup> | Au <sup>8</sup> | Au <sup>9</sup> | Au <sup>10</sup> |
| <b>In Au<sub>9</sub><sup>T</sup></b>  | 0.008           | 0.011           | 0.002           | -0.011          | -0.010           |
| <b>In Au<sub>10</sub><sup>T</sup></b> | 0.012           | 0.014           | 0.002           | -0.012          | -0.007           |

Note: The total charge of all Au atoms in **Au<sub>10</sub><sup>T</sup>/Au<sub>9</sub><sup>T</sup>** are 0.207 and -0.030 respectively. the charge of 5<sup>th</sup>DMPP in **Au<sub>10</sub><sup>T</sup>-I1/Au<sub>10</sub><sup>T</sup>-I2** are 0.213 and 0.327, demonstrating the electron-donating effect of the 5<sup>th</sup>DMPP. The sum of all atoms of C<sub>6</sub>H<sub>11</sub>C≡CAu moiety of **Au<sub>9</sub><sup>T</sup>-I1** is -0.242, demonstrating a significant electron-withdrawing effect of the C<sub>6</sub>H<sub>11</sub>C≡CAu complex.

**Table S7.** The different types of charge of Au atoms in the Au core of **Au<sub>10</sub><sup>T</sup>/Au<sub>9</sub><sup>T</sup>**.

| <b>In Au<sub>10</sub><sup>T</sup></b> | Au <sup>1</sup> | Au <sup>2</sup> | Au <sup>3</sup> | Au <sup>4</sup> | Au <sup>5</sup> | Au <sup>6</sup> | Au <sup>7</sup> | Au <sup>8</sup> | Au <sup>9</sup> | Au <sup>10</sup> |
|---------------------------------------|-----------------|-----------------|-----------------|-----------------|-----------------|-----------------|-----------------|-----------------|-----------------|------------------|
| Hirschfeld                            | 0.113           | 0.089           | 0.01            | 0.032           | -0.046          | 0.012           | 0.014           | 0.002           | -0.012          | -0.007           |
| Mulliken                              | 0.285           | 0.1             | -0.049          | -0.003          | -0.031          | -0.04           | -0.061          | -0.046          | -0.07           | -0.047           |
| Bader                                 | 0.065           | 0.06            | -0.101          | -0.082          | -0.108          | -0.118          | -0.1            | -0.112          | -0.113          | -0.111           |
| <b>In Au<sub>9</sub><sup>T</sup></b>  | Au <sup>1</sup> | Au <sup>2</sup> | Au <sup>3</sup> | Au <sup>4</sup> | Au <sup>5</sup> | Au <sup>6</sup> | Au <sup>7</sup> | Au <sup>8</sup> | Au <sup>9</sup> | Au <sup>10</sup> |
| Hirschfeld                            | -               | 0.007           | 0.001           | 0.011           | -0.049          | 0.008           | 0.011           | 0.002           | -0.011          | -0.01            |
| Mulliken                              | -               | -0.005          | -0.05           | -0.026          | -0.066          | -0.007          | -0.031          | -0.045          | -0.058          | -0.054           |
| Bader                                 | -               | -0.109          | -0.126          | -0.104          | -0.127          | -0.106          | -0.109          | -0.105          | -0.107          | -0.109           |

Note: The total Hirschfeld, Mulliken and Bader charge of all Au atoms in **Au<sub>10</sub><sup>T</sup>** are 0.207, 0.038 and -0.72 respectively. And the total Hirschfeld, Mulliken and Bader charge of all Au atoms in **Au<sub>9</sub><sup>T</sup>** are -0.03, -0.342 and -1.002 respectively.

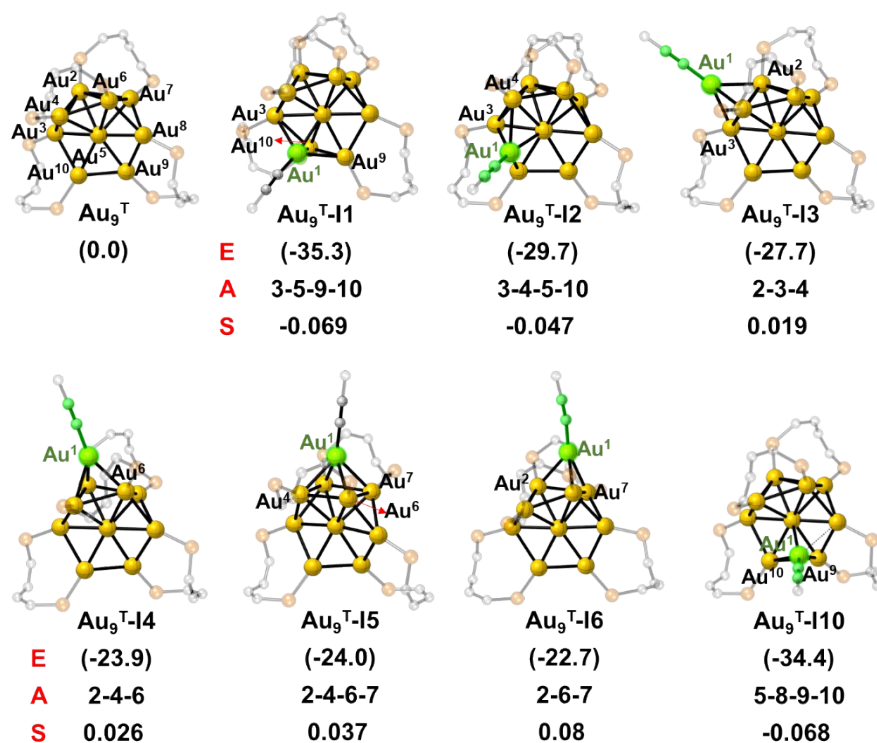

**Figure S15.** The relative bonding energy of different structures formed by the binding of  $\{\text{Au}^1\}$  on different blocks. The relative energy of  $\text{Au}_9^{\text{T}}$  was set as the reference. E: relative bond energy; A: bonding atoms; S: sum of Hirschfeld charges of the bonding atoms in  $\text{Au}_9^{\text{T}}$ .

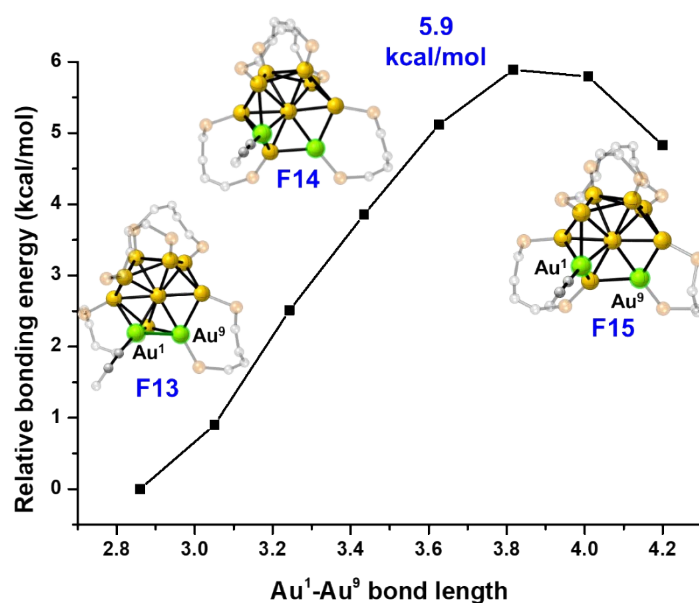

**Figure S16.** Partial optimization by fixing the  $\text{Au}^1\text{-Au}^9$  bond length at different values (from 2.860 Å in  $\text{Au}_9^{\text{T-I1}}$  to 4.200 Å in  $\text{Au}_9^{\text{T-I2}}$ ). The relative bonding energies are given in kcal/mol, and the relative energy of **F13** is set as the reference.

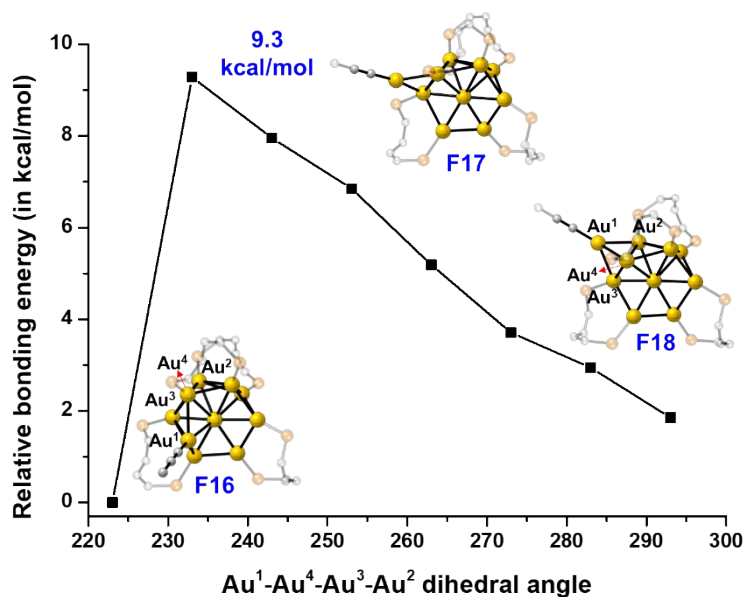

**Figure S17.** Partial optimization by fixing the Au<sup>1</sup>-Au<sup>4</sup>-Au<sup>3</sup>-Au<sup>2</sup> dihedral angle at different values (from 223.1° in Au<sub>9</sub><sup>T-I2</sup> to 293.0° in Au<sub>9</sub><sup>T-I3</sup>). The relative bonding energies are given in kcal/mol, and the relative energy of F16 is set as the reference.

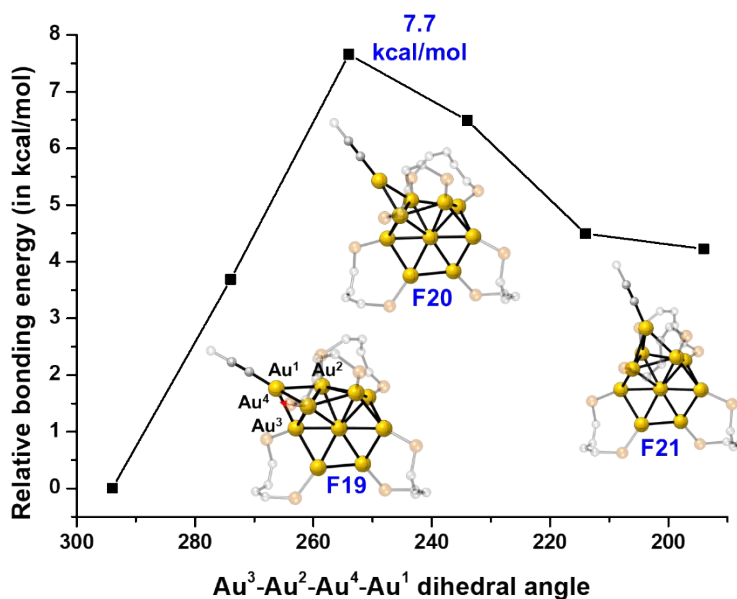

**Figure S18.** Partial optimization by fixing the Au<sup>3</sup>-Au<sup>2</sup>-Au<sup>4</sup>-Au<sup>1</sup> dihedral angle at different values (from 294.0° in Au<sub>9</sub><sup>T-I3</sup> to 194.0° in Au<sub>9</sub><sup>T-I4</sup>). The relative bonding energies are given in kcal/mol, and the relative energy of F19 is set as the reference.

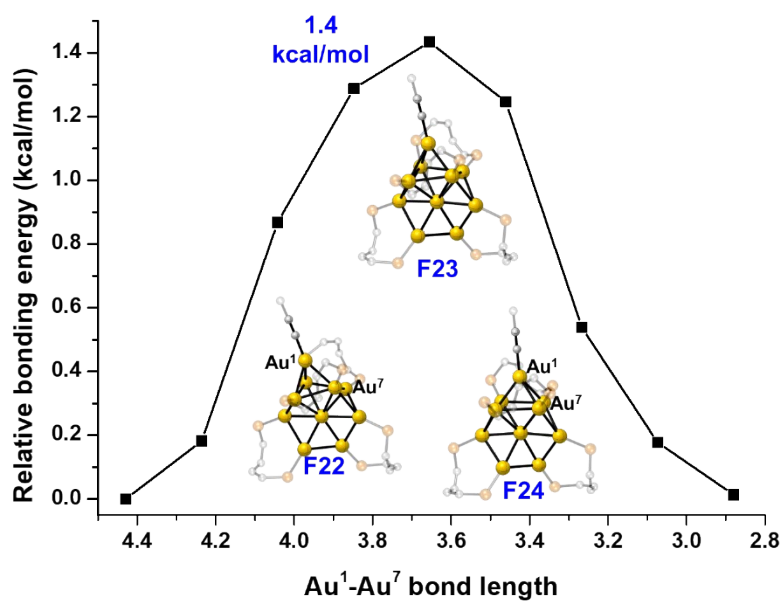

**Figure S19.** Partial optimization by fixing the Au<sup>1</sup>-Au<sup>7</sup> bond length at different values (from 4.429 Å in Au<sub>9</sub><sup>T-I4</sup> to 2.880 Å in Au<sub>9</sub><sup>T-I5</sup>). The relative bonding energies are given in kcal/mol, and the relative energy of F22 is set as the reference.

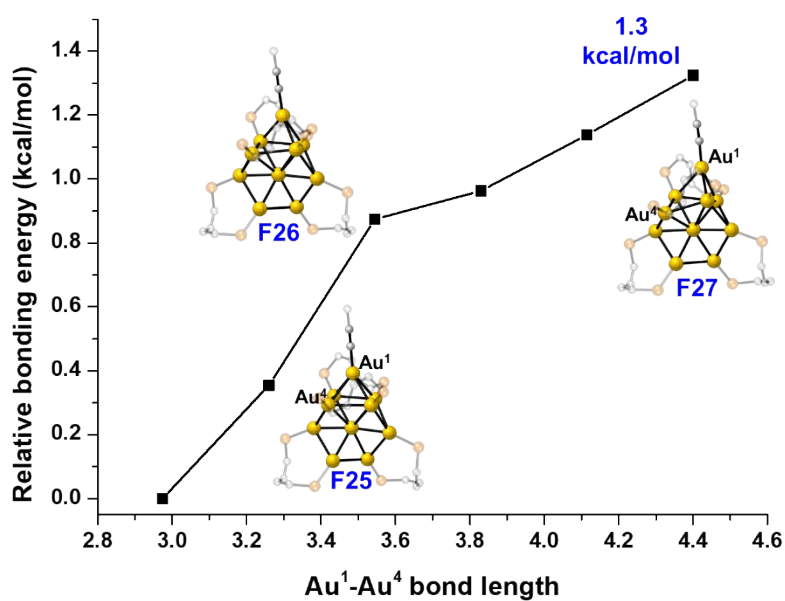

**Figure S20.** Partial optimization by fixing the Au<sup>1</sup>-Au<sup>4</sup> bond length at different values (from 2.974 Å in Au<sub>9</sub><sup>T-I5</sup> to 4.400 Å in Au<sub>9</sub><sup>T-I6</sup>). The relative bonding energies are given in kcal/mol, and the relative energy of F25 is set as the reference.

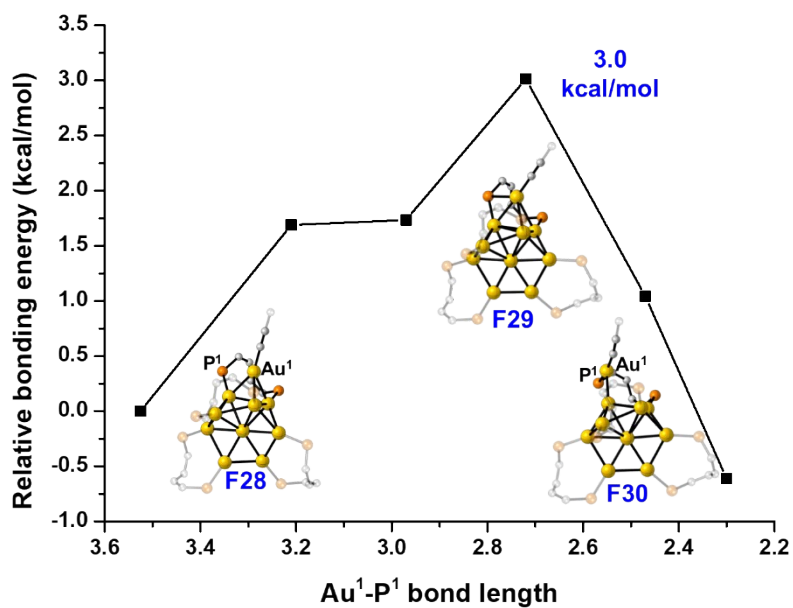

**Figure S21.** Partial optimization by fixing the Au<sup>1</sup>-P<sup>1</sup> bond length at different values (from 3.525 Å in Au<sub>9</sub><sup>T-I6</sup> to 2.300 Å in Au<sub>9</sub><sup>T-I7</sup>). The relative bonding energies are given in kcal/mol, and the relative energy of F28 is set as the reference.

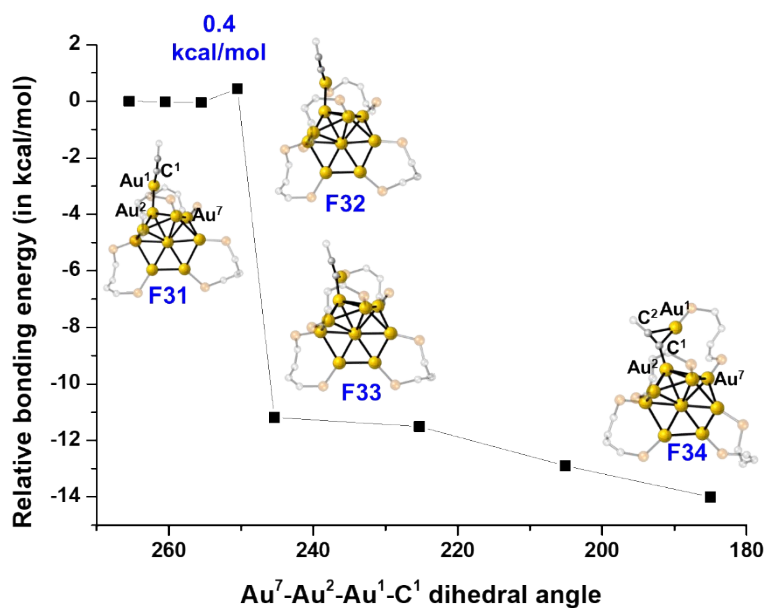

**Figure S22.** Partial optimization by fixing the Au<sup>7</sup>-Au<sup>2</sup>-Au<sup>1</sup>-C<sup>1</sup> dihedral angle at different values (from 265.5° in Au<sub>9</sub><sup>T-I7</sup> to 185.0° in Au<sub>9</sub><sup>T-I8</sup>). The relative bonding energies are given in kcal/mol, and the relative energy of F31 is set as the reference.

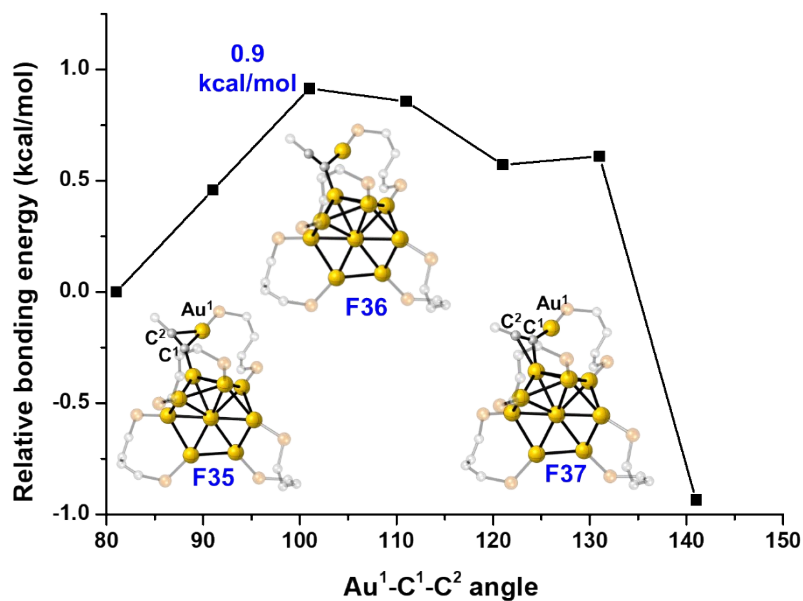

**Figure S23.** Partial optimization by fixing the Au<sup>1</sup>-C<sup>1</sup>-C<sup>2</sup> angle at different values (from 81.0° in Au<sub>9</sub><sup>T-18</sup> to 141.0° in Au<sub>9</sub><sup>T-19</sup>). The relative bonding energies are given in kcal/mol, and the relative energy of **F35** is set as the reference.

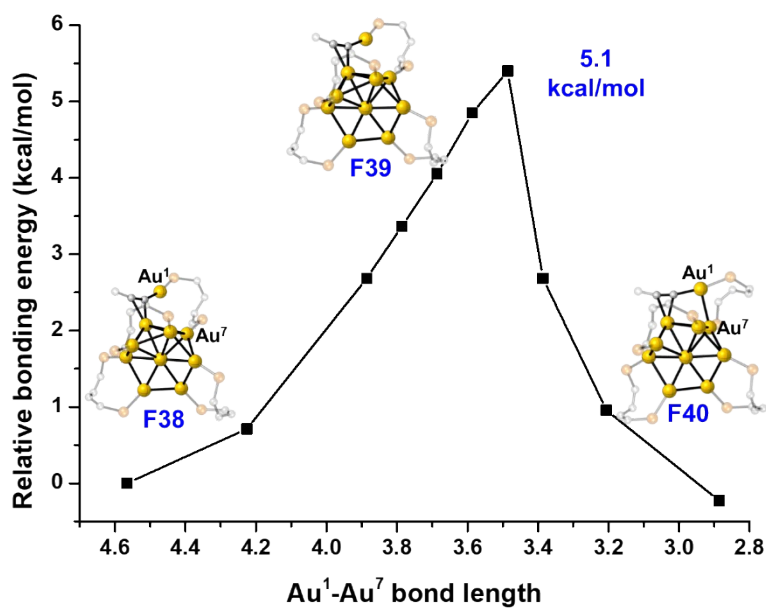

**Figure S24.** Partial optimization by fixing the Au<sup>1</sup>-Au<sup>7</sup> bond length at different values (from 4.556 Å in Au<sub>9</sub><sup>T-19</sup> to 2.886 Å in Au<sub>10</sub><sup>T</sup>). The relative bonding energies are given in kcal/mol, and the relative energy of **F38** is set as the reference.

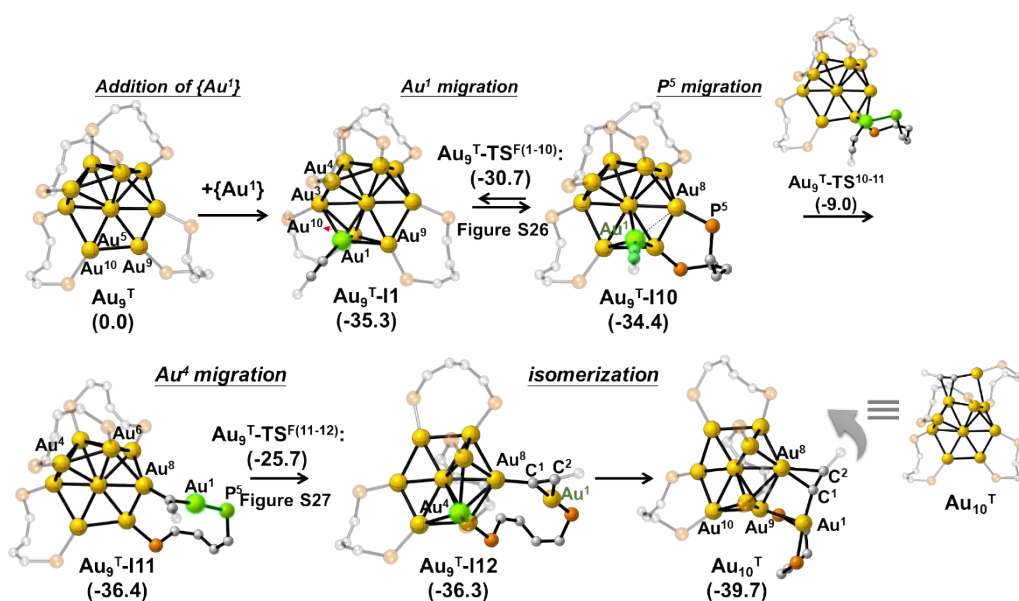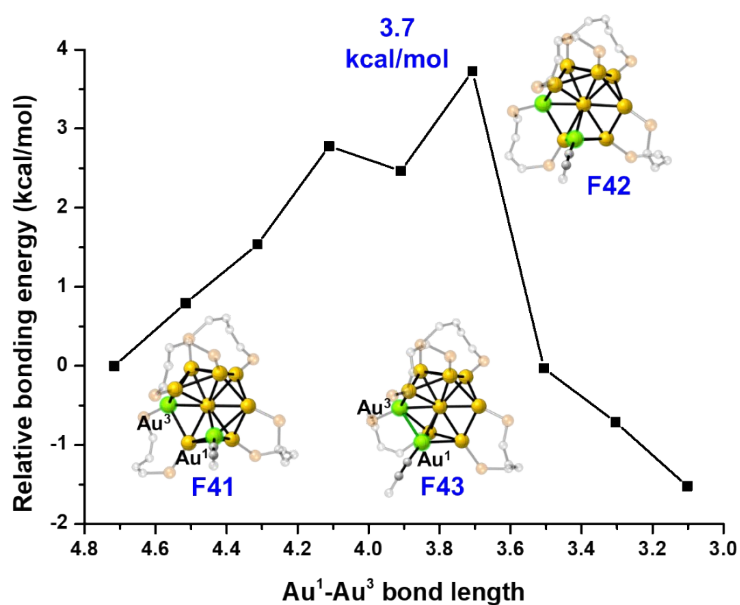

**Figure S26.** Partial optimization by fixing the  $\text{Au}^1\text{-Au}^3$  bond length at different values (from 4.716 Å in  $\text{Au}_9^{\text{T-I10}}$  to 2.900 Å in  $\text{Au}_9^{\text{T-I1}}$ ). The relative bonding energies are given in kcal/mol, and the relative energy of **F41** is set as the reference.



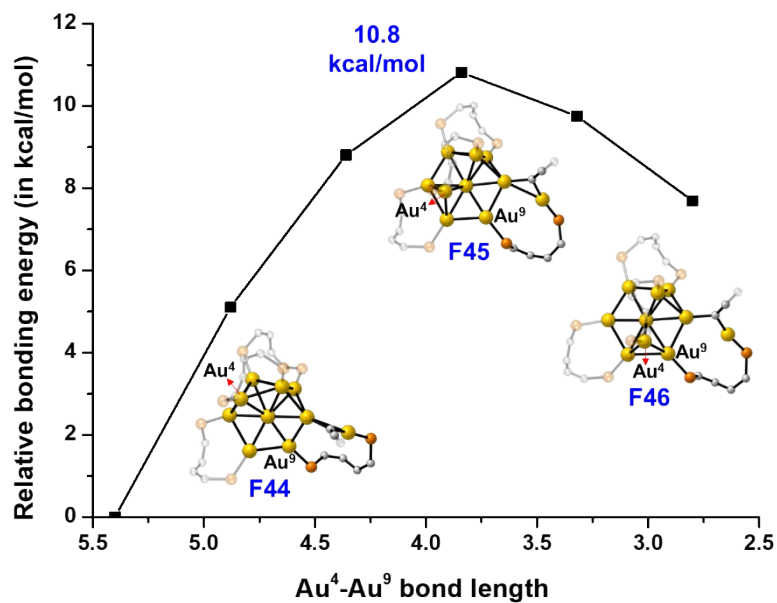

**Figure S27.** Partial optimization by fixing the Au<sup>4</sup>-Au<sup>9</sup> bond length at different values (from 5.400 Å in Au<sub>9</sub><sup>T</sup>-I11 to 2.800 Å in Au<sub>9</sub><sup>T</sup>-I12). The relative bonding energies are given in kcal/mol, and the relative energy of F44 is set as the reference.

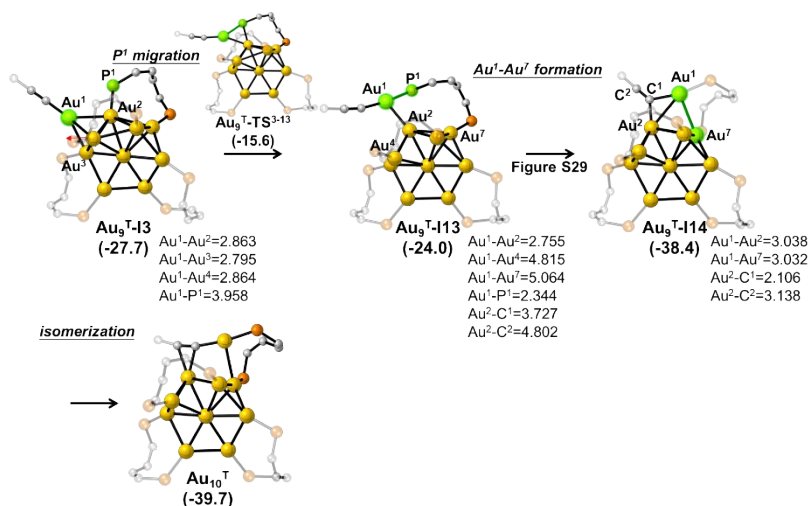

**Figure S28.** The optimized geometry and the relative bonding energies (in kcal/mol) for phosphine migration on Au<sub>9</sub><sup>T</sup>-I3.

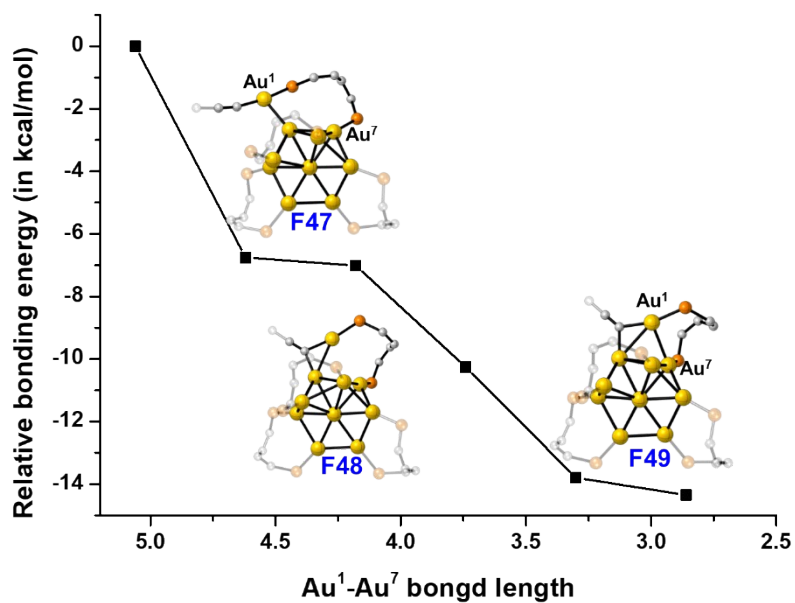

**Figure S29.** Partial optimization by fixing the Au<sup>1</sup>-Au<sup>7</sup> bond length at different values (from 5.060 Å in Au<sub>9</sub><sup>T</sup>-I13 to 2.860 Å in Au<sub>9</sub><sup>T</sup>-I14). The relative bonding energies are given in kcal/mol, and the relative energy of F47 is set as the reference.

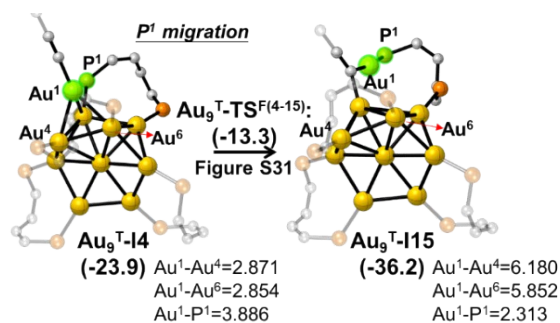

**Figure S30.** The optimized geometry and the relative bonding energies (in kcal/mol) for phosphine migration on Au<sub>9</sub><sup>T</sup>-I4.

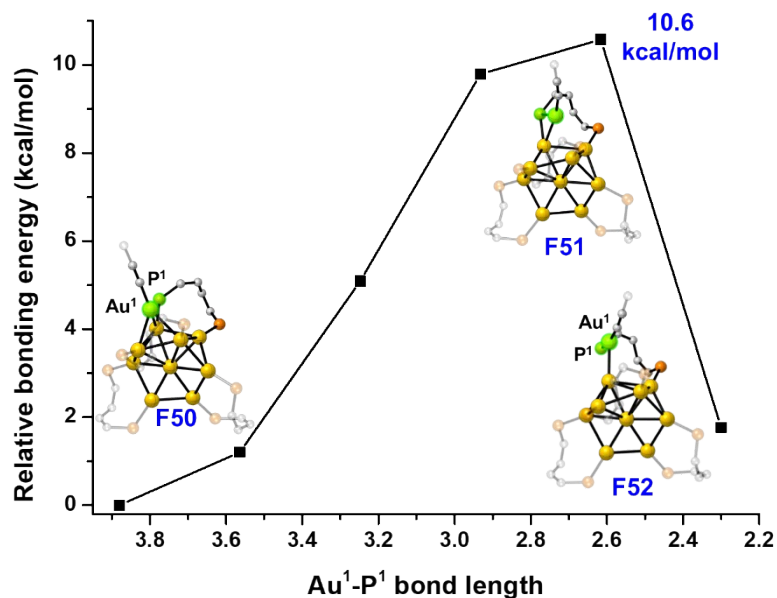

**Figure S31.** Partial optimization by fixing the Au<sup>1</sup>-P<sup>1</sup> bond length at different values (from 3.880 Å in Au<sub>9</sub><sup>T</sup>-I4 to 2.300 Å in Au<sub>9</sub><sup>T</sup>-I15). The relative bonding energies are given in kcal/mol, and the relative energy of F50 is set as the reference.

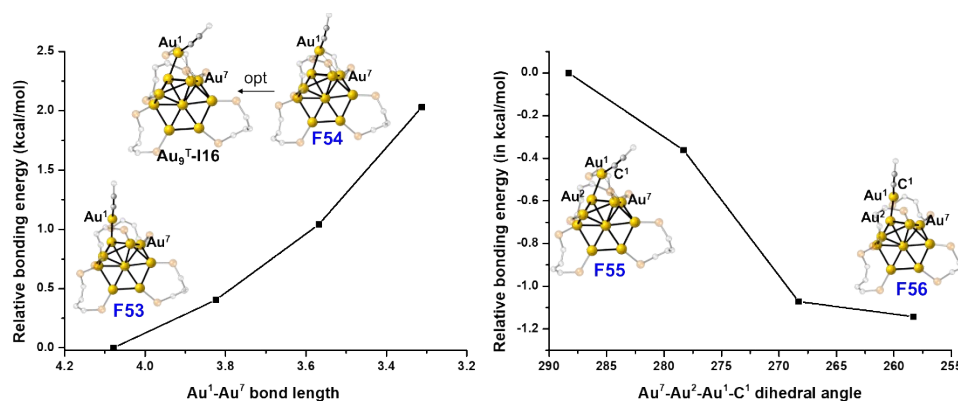

**Figure S32.** The Au<sup>1</sup>-Au<sup>7</sup> bond formation induced conversion of Au<sub>9</sub><sup>T</sup>-I7 to Au<sub>10</sub><sup>T</sup>. Left: the partial optimization by fixing the Au<sup>1</sup>-Au<sup>7</sup> bond length at different values (from 4.079 Å in Au<sub>9</sub><sup>T</sup>-I13 to 3.312 Å in F54), Au<sub>9</sub><sup>T</sup>-I16 is the result of F54 optimization. Right: the partial optimization by fixing the Au<sup>7</sup>-Au<sup>2</sup>-Au<sup>1</sup>-C<sup>1</sup> dihedral angle at different values (from 288.3° in Au<sub>9</sub><sup>T</sup>-I16 to 258.3° in F56).
